# Supplementary material for: IL-12 drives functional plasticity of human group 2 innate lymphoid cells
Source: PubMed Central journal article supplement — J Exp Med. 2016 Apr 4;213(4):569–83. doi: 10.1084/jem.20151750 (PMC4821648; doi:10.1084/jem.20151750), 2016-04-04
Supplement: supp_jem.20151750_JEM_20151750_sm.pdf [file supp_jem.20151750_JEM_20151750_sm.pdf]

SUPPLEMENTAL MATERIAL

Lim et al., <http://www.jem.org/cgi/content/full/jem.20151750/DC1>

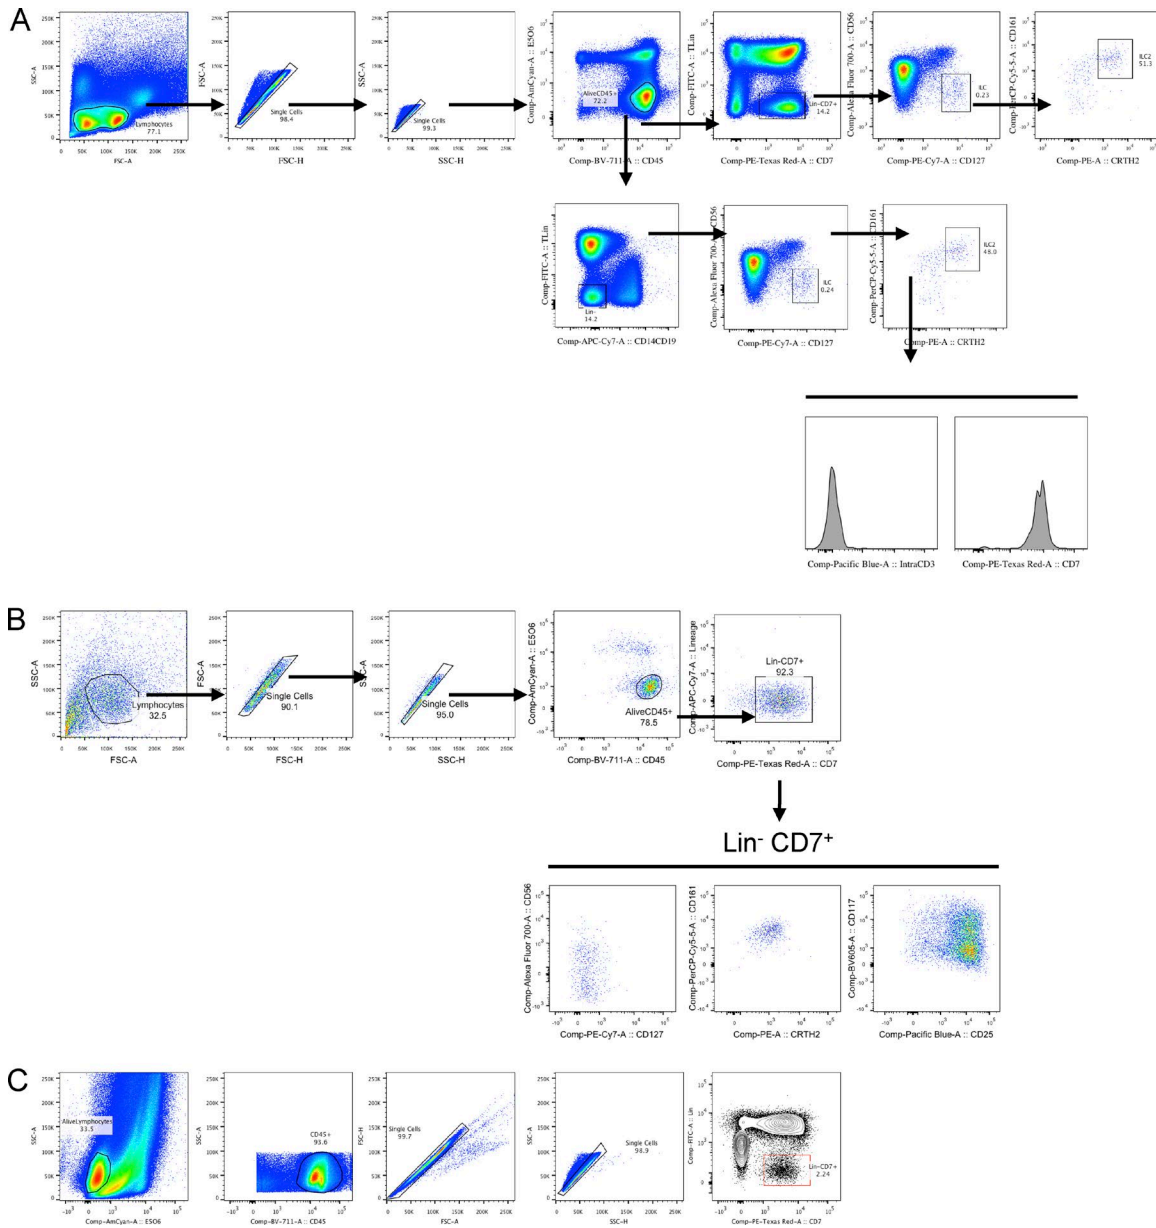

Figure S1. **ILC2 gating strategy.** FACS analysis of ILCs from human peripheral blood (A), culture-expanded ILC2 (B), or intestinal ILCs (C). (A) Cells were first gated on lymphoid size and side scatter; singlet and viable CD45<sup>+</sup>Lin<sup>-</sup>CD7<sup>+</sup>CD127<sup>hi</sup> cells that expressed high levels of CRTh2 and CD161 were considered to be ILC2. (B) Bulk ILC2 cultured with irradiated PBMCs in IL-2, -7, -25, and -33 for 7 d. Culture-expanded cells were gated on lymphoid size and side scatter; singlet, viable CD45<sup>+</sup>Lin<sup>-</sup>CD7<sup>+</sup> cells were then analyzed for ILC2 markers as shown. (C) Intestinal ILC2 were gated on lymphoid size and side scatter; singlet, viable CD45<sup>+</sup>Lin<sup>-</sup>CD7<sup>+</sup> cells were then analyzed.

Table S1. Primers used for single cell Biomark analysis

| Gene name       | Forward primer (5'→3')   | Reverse primer (5'→3')   |
|-----------------|--------------------------|--------------------------|
| <i>IL7R</i>     | GGAGAAAGTGGCTATGCTCAA    | CTGCGATCCATTCACTTCCA     |
| <i>ACTB</i>     | CCAACCGCGAGAAGATGAC      | TAGCACAGCCTGGATAGCAA     |
| <i>B2M</i>      | TCCGTGGCCTTAGCTGTG       | CCCAGACACATAGCAATTGAGG   |
| <i>GATA3</i>    | CACGGTGCGAGGTAACCC       | AGGGTAGGGATCCATGAAGCA    |
| <i>GAPDH</i>    | ACACCATGGGGAAGGTGAAG     | GTGACCAGGCGCCAATA        |
| <i>RORA</i>     | CAGCAGATAACGTGGCAGAC     | GGCACACAATTGCCACATCA     |
| <i>ID2</i>      | CTCAACACGGATATCAGCATCC   | CACACAGTGCCTTTGCTGTCA    |
| <i>AHR</i>      | TAGGCTCAGCGTCAGTTACC     | TGGCTCCGTTTCTTTCAGTA     |
| <i>TNFRSF25</i> | CAGGGCGGCACTCGTA         | AGCCTCTGCAACAAAACAGAC    |
| <i>MAF</i>      | TCGACGACCGCTTCTCC        | ATCACCTCCTCTTGCTGAC      |
| <i>CCR6</i>     | AGGCAGCGATGCTGTGAA       | AGCTCAAGCCCAACATCA       |
| <i>PTGDR2</i>   | TCCAGGGCTGGAATCCTGT      | GGCAGAGTGGCTTCAGTGT      |
| <i>CD40L</i>    | GAGGCCAGCAGTAAACAAC      | AGTTGTTGCTCATGGTGTAGTA   |
| <i>IL17RB</i>   | TGGTGGCAGGATCTATCTA      | GCAGTAGTGTGGTGGTAGAA     |
| <i>ICOS</i>     | AGTCTGCATTTTGGGATGCA     | GTCGTGCACACTGGATGAA      |
| <i>IL13</i>     | TGCAGTGCCATCGAGAAGAC     | TCGGACATGCAAGCTGGAAA     |
| <i>IL1RL1</i>   | GGCGACCAGTCTTCTAC        | AGGGGCTCCGATTACTGGAA     |
| <i>CSF2</i>     | TGATGGCCAGCCACTACAA      | CAAAGGGGATGACAAGCAGAAA   |
| <i>ZEB2</i>     | AGGCCAATGGCAAGAAGAA      | AGGTCAGCAGTTGGGCAA       |
| <i>EOMES</i>    | CTGTGGCAAAGCCGACAATA     | CTCATCCAGTGGGAACCAGTA    |
| <i>IFNG</i>     | ACTGCCAGGACCCATATGTAA    | GTTCCATTATCCGCTACATCTGAA |
| <i>TBX21</i>    | GGCGTCCAAACAATGTGAC      | CCGTCGTTACCTCAACGATA     |
| <i>IRF4</i>     | CACCATGACAACGCCTTACC     | CGAGGGTGGCATCATGTA       |
| <i>IL5</i>      | ACTCTGAGGATTCCTGTTCTGTGA | CCAGTGTGCCTATTCCTGAAA    |
| <i>NFIL3</i>    | CCGCCCTTTCTTCTCC         | GGATAAATCCGTGAGGCTCCTTA  |
| <i>PPARG</i>    | TAGATGACAGCGACTTGGCAATA  | TGGGCTTCACATTCAGCAAAC    |
| <i>AREG</i>     | GGTGGTCTGTGCTCTT         | GCTTCCAGAGTAGGTGTCATT    |
| <i>IL4</i>      | CAGCTGATCCGATTCCTGAAA    | GTTGGTTCCTTACAGGAC       |
| <i>RORC</i>     | CAAGACTCATGCCAAAGCA      | TTTCCACATGCTGGTACAC      |
| <i>CCR7</i>     | GTGGTGGCTCTCCTTGCA       | TGTGGTGTGCTCCGATGTA      |
| <i>KIT</i>      | GGATTCCAGAGCCACAA        | ACATCCACTGGCAGTACAGAA    |
| <i>CCR2</i>     | GCTGAGAAGCCTGACATACCA    | GGGAAATGCGTCTTGTTCAA     |

Table S2. Characteristics of Crohn's disease patients

| Patient ID | Age | Gender | Active medications          | Disease duration | Indication for surgery |
|------------|-----|--------|-----------------------------|------------------|------------------------|
| 1          | 62  | Female | Vedolizumab                 | 31 yr            | Intestinal stricture   |
| 2          | 65  | Male   | None                        | 42 yr            | Intestinal stricture   |
| 3          | 19  | Male   | Budesonide and antibiotics  | 8 mo             | Intestinal fistula     |
| 4          | 38  | Male   | Azathioprine and Infliximab | 16 mo            | Intestinal stricture   |

Table S3. **Antibodies used for flow cytometric analysis**

| Antibody           | Clone           | Manufacturer    |
|--------------------|-----------------|-----------------|
| CD3                | OKT3            | eBioscience     |
| CD5                | L17F12          | eBioscience     |
| TCR $\alpha\beta$  | IP16            | eBioscience     |
| TCR $\gamma\delta$ | B1.1            | eBioscience     |
| CD14               | TÜK4            | Miltenyi Biotec |
| CD19               | LT19            | Miltenyi Biotec |
| CD7                | M-T701          | BD              |
| CD56               | B159            | BD              |
| CD127              | eBioRDR5        | eBioscience     |
| CD161              | DX12            | BD              |
| CRTH2              | BM16            | Miltenyi Biotec |
| CD117              | 104D2           | BioLegend       |
| CD25               | BC96            | eBioscience     |
| KLRG1              | 2F1/KLRG1       | BioLegend       |
| CCR6               | 11A9            | BD              |
| CD11a              | HI111           | BioLegend       |
| CD2                | RPA-2.10        | BioLegend       |
| CD90               | 5E10            | BD              |
| IL1R1              | NA <sup>a</sup> | R&D Systems     |
| IL17RB             | NA <sup>a</sup> | R&D Systems     |
| ST2                | B4E6            | MD Biosciences  |
| GATA-3             | TWJ             | eBioscience     |
| T-BET              | eBio4B10        | eBioscience     |
| ROR $\gamma$ t     | AFKLS-9         | eBioscience     |
| IL-13              | JES10-5A2       | BD              |
| IL-5               | JES1-39D10      | BioLegend       |
| IL-17A             | CZ8-23G1        | Miltenyi Biotec |

<sup>a</sup>NA, not available.
